# Supplementary material
Source: publisher figshare collection journal article supplement (https://tandf.figshare.com/articles/dataset/_/25028035)
Supplement: Supplementary file 1 [file 44133829]

# Perceived Importance of Context-Specific Built-Environment Factors of Walking: A New Perspective for Prioritizing Policy Measures for Promoting Walking

## Supplementary Material (Date of Submission: 30.10.2023, IJST)

Caroline Koszowski <sup>a\*</sup>, Rico Wittwer <sup>a</sup>, Stefan Hubrich <sup>a</sup>, Regine Gerike <sup>a</sup>

<sup>a</sup> TUD Dresden University of Technology, "Friedrich List" Faculty of Transport and Traffic Sciences, Chair of Mobility System Planning, Dresden, Germany.

\*corresponding author: M.Sc. Caroline Koszowski,

ORCID: 0000-0003-1279-7726; E-mail: [caroline.koszowski@tu-dresden.de](mailto:caroline.koszowski@tu-dresden.de)

### **Supplementary Material**

|                                                                                             |    |
|---------------------------------------------------------------------------------------------|----|
| Figure S 1: Schematic Illustration of the Building Types of Question 1.1 .....              | 2  |
| Table S 1. Calculation Steps of the Variable "Area Type By Predominant Building Type" ..... | 3  |
| Table S 2. Model 1: Matrix of Correlations (SPSS Version 27) .....                          | 5  |
| Table S 3. Model 2: Matrix of Correlations (SPSS Version 27) .....                          | 6  |
| Table S 4. Model 1: Socio-Demographic and Socio-Economic Factors .....                      | 7  |
| Table S 5. Model 1: Meso-Scale Factors (Neighborhood) .....                                 | 8  |
| Table S 6. Model 1: Micro-Scale Factors (Streetscape) .....                                 | 9  |
| Table S 7. Model 1: Further Descriptives: Perception of Walking Characteristics .....       | 10 |
| Table S 8. Model 1: Further Descriptives: Mode Choice Criteria .....                        | 10 |
| Table S 9. Model 2: Socio-Demographic and Socio-Economic Factors .....                      | 11 |
| Table S 10. Model 2: Meso-Scale Factors (Neighborhood) .....                                | 12 |
| Table S 11. Model 2: Micro-Scale Factors (Streetscape) .....                                | 13 |
| Table S 12. Model 2: Further Descriptives: Perception of Walking Characteristics .....      | 13 |
| Table S 13. Model 2: Further Descriptives: Mode Choice Criteria .....                       | 14 |

Figure S 1: Schematic Illustration of the Building Types of Question 1.1

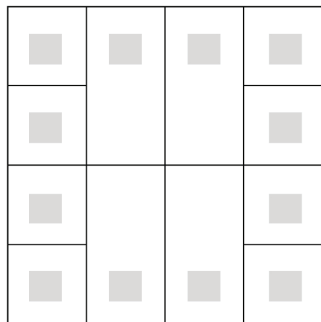

1) Detached Single-Family House on a Single Lot

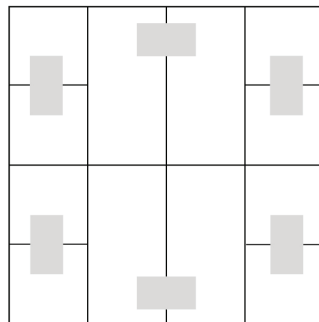

2) Semi-Detached House

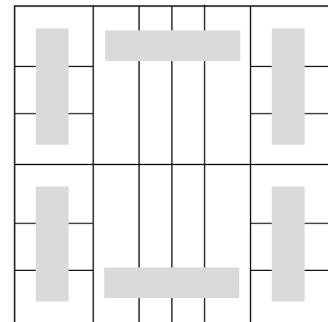

3) Row House

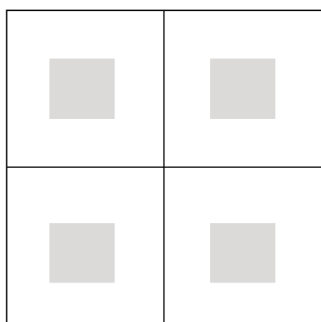

4) Detached Apartment House on a Single Lot

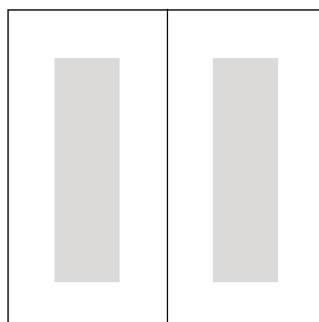

5.1) Rowed Apartment House as Parallel Apartment Buildings  
 Green Areas Inbetween with  
 - up to 6 floors or with  
 - more than 6 floors (Large Housing Estate)

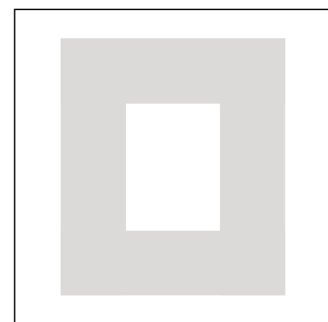

5.2) Rowed Apartment House as Apartment Buildings (Blocks) often with Backyards in  
 - Residential Areas or in  
 - Mixed Areas

Table S 1. Calculation Steps of the Variable "Area Type By Predominant Building Type"

| Input Variables                                                                                                                                                                                                                                                                                                                                                                                                               | Computing by SPSS                                                                                                                                                                                                                                                                                                                                                                                                                                                                                                                                                                                                                                                                                                                                                                                                                                                                                                                                                                                                                                                                                                                                                                                                                                                          | Outcome Variable                                                                                                                                                                                                                                                           |
|-------------------------------------------------------------------------------------------------------------------------------------------------------------------------------------------------------------------------------------------------------------------------------------------------------------------------------------------------------------------------------------------------------------------------------|----------------------------------------------------------------------------------------------------------------------------------------------------------------------------------------------------------------------------------------------------------------------------------------------------------------------------------------------------------------------------------------------------------------------------------------------------------------------------------------------------------------------------------------------------------------------------------------------------------------------------------------------------------------------------------------------------------------------------------------------------------------------------------------------------------------------------------------------------------------------------------------------------------------------------------------------------------------------------------------------------------------------------------------------------------------------------------------------------------------------------------------------------------------------------------------------------------------------------------------------------------------------------|----------------------------------------------------------------------------------------------------------------------------------------------------------------------------------------------------------------------------------------------------------------------------|
| <b>Step 1: Ranking by Predominant Building Type</b>                                                                                                                                                                                                                                                                                                                                                                           |                                                                                                                                                                                                                                                                                                                                                                                                                                                                                                                                                                                                                                                                                                                                                                                                                                                                                                                                                                                                                                                                                                                                                                                                                                                                            |                                                                                                                                                                                                                                                                            |
| <p>BT_1: Detached single-family houses on a single lot*</p> <p>BT_2: Semi-detached house*</p> <p>BT_3: Row house*</p> <p>BT_4: Detached apartment houses on a single lot*</p> <p>BT_5: Rowed apartment houses*</p> <p>*Scale:</p> <p>-11 = Empty</p> <p>-8 = Question not asked</p> <p>1 = Not Present</p> <p>2 = A few Present</p> <p>3 = Predominantly Present</p> <p>4 = All Buildings Correspond to the Building Type</p> | <p>Compute PBT_R=5.</p> <p>IF (BT_5=1) &amp; (BT_4=1) &amp; (BT_3=1) &amp; (BT_2=1) &amp; (BT_1=1)) PBT_R=-7.</p> <p>IF (BT_5=4) &amp; (BT_4=4) &amp; (BT_3=4) &amp; (BT_2=4) &amp; (BT_1=4)) PBT_R=-7.</p> <p>IF (BT_4&gt;BT_5) PBT_R=4.</p> <p>IF (BT_3&gt;BT_4 &amp; BT_3&gt;BT_5) PBT_R=3.</p> <p>IF (BT_2&gt;BT_3 &amp; BT_2&gt;BT_4 &amp; BT_2&gt;BT_5) PBT_R=2.</p> <p>IF (BT_1&gt;BT_2 &amp; BT_1&gt;BT_3 &amp; BT_1&gt;BT_4 &amp; BT_1&gt;BT_5) PBT_R=1.</p> <p>EXECUTE.</p> <p>Commands translated into clear text</p> <p>Compute new Variable PBT_R= 5 (highest Prio)</p> <p>*if all BTs are "not present"; Building Type Ranked (PBT_R) is not valid (-7)</p> <p>*if all BTs are "All Buildings Correspond to the Building Type"; Building Type Ranked (PBT_R) is not valid (-7)</p> <p>*if more Detached Apartment Houses than Rowed Apartment Houses, then PBT_R= 4 (Detached Apartment Houses)</p> <p>*if more Row Houses than Detached Apartment Buildings and Rowed Apartment Houses, then PBT_R= 3 (Row Houses)</p> <p>* if more Semi-detached Houses than Row Houses, Detached Apartment Buildings and Detached Apartment Houses, then PBT_R= 2 Semi-detached House</p> <p>*if more Single Detached Houses than other building types, then PBT_R= 1</p> | <p>PBT_R: Predominant Building Type Ranked:</p> <p>-7 = Not valid</p> <p>1 = Detached Single-Family Houses on a Single Lot</p> <p>2 = Semi-detached house</p> <p>3 = Row Houses</p> <p>4 = Detached Apartment Houses on a Single Lot</p> <p>5 = Rowed Apartment Houses</p> |

| <b>Step 1.1: Recoding and Merging PBT_R 1-3 into one category with similar residential density; New Variable PBT_R_grouped</b>                                                                                                                                                                                                                                                                                                                                                                                                                                                         |                                                                                                                                                                                                                                                                                                                                                                                                                                                                                                                                                                            |                                                                                                                                                                                                                                                                                                                                                                                                                                                                                                                                                                   |
|----------------------------------------------------------------------------------------------------------------------------------------------------------------------------------------------------------------------------------------------------------------------------------------------------------------------------------------------------------------------------------------------------------------------------------------------------------------------------------------------------------------------------------------------------------------------------------------|----------------------------------------------------------------------------------------------------------------------------------------------------------------------------------------------------------------------------------------------------------------------------------------------------------------------------------------------------------------------------------------------------------------------------------------------------------------------------------------------------------------------------------------------------------------------------|-------------------------------------------------------------------------------------------------------------------------------------------------------------------------------------------------------------------------------------------------------------------------------------------------------------------------------------------------------------------------------------------------------------------------------------------------------------------------------------------------------------------------------------------------------------------|
| PBT_R: Predominant Building Type Ranked                                                                                                                                                                                                                                                                                                                                                                                                                                                                                                                                                | RECODE PBT_R (-7=-7) (1=1) (2=1) (3=1) (4=2) (5=3) INTO PBT_R_grouped.<br>VARIABLE LABELS PBT_R_grouped 'Building Type Ranked grouped'.<br>EXECUTE.                                                                                                                                                                                                                                                                                                                                                                                                                        | PBT_R_grouped: Building Type Ranked (grouped):<br>-7 = not valid<br>1 = (Detached) Single-Family Houses<br>2 = Detached Apartment Buildings<br>3 = Rowed apartment houses                                                                                                                                                                                                                                                                                                                                                                                         |
| <b>Step 2: Specification of Predominant Building Type Ranked (PBT_R) and Creating Final New Variable "Area Type by Predominant Building Type" AT_PBT/AT_PBT_LOG</b>                                                                                                                                                                                                                                                                                                                                                                                                                    |                                                                                                                                                                                                                                                                                                                                                                                                                                                                                                                                                                            |                                                                                                                                                                                                                                                                                                                                                                                                                                                                                                                                                                   |
| PBT_R_grouped: Building Type Ranked grouped and<br>BT_Spec: Further Specification of Building Type "Rowed Apartment Houses":<br>-8 = Question not answered<br>1 = Residential area, no or only few non-residential usages in the buildings, often with backyards<br>2 = Residential area with parallel apartment buildings (up to 6 floors, without backyards) and green areas between the buildings<br>3 = Mixed area, with many stores on the first floor or service providers in the buildings, often with backyards<br>4 = Large housing estate (6 and more floors)<br>99 = Others | RECODE PBT_R_grouped (ELSE=Copy) INTO AT_PBT.<br>VARIABLE LABELS AT_PBT "Area Type by Predominant Building Type".<br>IF (BT_Spec=99) AT_PBT=99.<br>IF (PBT_R_grouped=3 & BT_Spec=1)   (PBT_R_grouped=3 & BT_Spec=2) AT_PBT=3.<br>IF (PBT_R_grouped=3 & BT_Spec=3)   (PBT_R_grouped=3 & BT_Spec=4) AT_PBT=4.<br>EXECUTE.<br><br>*LAST STEP Recoding for Logistic Regression<br>AT_PBT_LOG:<br>RECODE AT_PBT (-7=-7) (99=99) (1=0) (2=1) (3=2) (4=3) INTO AT_PBT_LOG.<br>VARIABLE LABELS AT_PBT_LOG 'Area Type by Predominant Building Type - Ready for LogReg'.<br>EXECUTE. | AT_PBT: Area Type by Predominant Building Type:<br>-7 = Not valid<br>1 = (Detached) Single-Family Houses<br>2 = Detached Apartment Buildings<br>3 = Rowed Apartment Buildings in Residential Areas<br>4 = Rowed Apartment Buildings in Mixed Areas<br>99 = Others<br><br>AT_PBT_LOG: Area Type by Predominant Building Type<br>– Ready for LogReg<br>-7 = Not valid<br>0 = Detached Single-Family Houses<br>1 = Detached Apartment Buildings<br>2 = Rowed Apartment Buildings in Residential Areas<br>3 = Rowed Apartment Buildings in Mixed Areas<br>99 = Others |

# Perceived Importance of Context-Specific Built-Environment Factors of Walking: A New Perspective for Prioritizing Policy Measures for Promoting Walking | Supplementary Material

Caroline Koszowski, Rico Wittwer, Stefan Hubrich, Regine Gerike (Date of Submission: 30.10.2023, IJST)

## Table S 2. Model 1: Matrix of Correlations (SPSS Version 27)

|                                        |                    | Korrelationen                                            |                                        |                                                       |                         |                       |                               |                  |                    |                          |                                                        |                                          |                                         |                                         |                                      |                                                     |                                        |                                 |                |                 |                                    |                                                               |                                                          |                     |                        |                         |                |      |      |
|----------------------------------------|--------------------|----------------------------------------------------------|----------------------------------------|-------------------------------------------------------|-------------------------|-----------------------|-------------------------------|------------------|--------------------|--------------------------|--------------------------------------------------------|------------------------------------------|-----------------------------------------|-----------------------------------------|--------------------------------------|-----------------------------------------------------|----------------------------------------|---------------------------------|----------------|-----------------|------------------------------------|---------------------------------------------------------------|----------------------------------------------------------|---------------------|------------------------|-------------------------|----------------|------|------|
|                                        |                    | Children in Households (Reference Category: No Children) | Number of Children in Total Households | Number of Bicycles and E-Bikes (Reference: 1 Bicycle) | Employment in Education | Employment (30 Years) | Employment (Aged 35 and Over) | Employment (Men) | Employment (Women) | Gender (Reference: Male) | High-School Graduates (Reference: High School Diploma) | Area Type (Detached Single-Family House) | Area Type (Detached Apartment Building) | Area Type (Attached Apartment Building) | Area Type (Rowed Apartment Building) | Accessibility of Public Transport (0-5 Minute Walk) | High Surface Quality (0-5 Minute Walk) | Street Furniture (e.g. Seating) | Public Toilets | Street Lighting | Trees and Planting Along Sidewalks | First Floor in Adjacent Buildings (Reference: No First Floor) | Appropriate Height of Buildings (Reference: 3-5 Stories) | Low Vehicle Traffic | Crime-Related Security | Traffic Accident Safety | Safe Crossings |      |      |
| Children in Households                 | Person-Korrelation | 1                                                        | .452                                   | -.055                                                 | .000                    | .000                  | .000                          | .000             | .000               | .000                     | -.004                                                  | .000                                     | .000                                    | .000                                    | .000                                 | .000                                                | .000                                   | .000                            | .000           | .000            | .000                               | .000                                                          | .000                                                     | .000                | .000                   | .000                    | .000           | .000 | .000 |
| Number of Children in Total Households | Person-Korrelation | .452                                                     | 1                                      | -.043                                                 | .000                    | .000                  | .000                          | .000             | .000               | .000                     | -.004                                                  | .000                                     | .000                                    | .000                                    | .000                                 | .000                                                | .000                                   | .000                            | .000           | .000            | .000                               | .000                                                          | .000                                                     | .000                | .000                   | .000                    | .000           | .000 | .000 |
| Number of Bicycles and E-Bikes         | Person-Korrelation | -.055                                                    | -.043                                  | 1                                                     | -.000                   | -.000                 | -.000                         | -.000            | -.000              | -.000                    | .000                                                   | .000                                     | .000                                    | .000                                    | .000                                 | .000                                                | .000                                   | .000                            | .000           | .000            | .000                               | .000                                                          | .000                                                     | .000                | .000                   | .000                    | .000           | .000 | .000 |

\*\* Die Korrelation ist auf dem Niveau von 0,05 (2-seitig) signifikant.  
 \* Die Korrelation ist auf dem Niveau von 0,10 (2-seitig) signifikant.

Perceived Importance of Context-Specific Built-Environment Factors of Walking: A New Perspective for Prioritizing Policy Measures for Promoting Walking | Supplementary Material Caroline Koszowski, Rico Wittwer, Stefan Hubrich, Regine Gerike (Date of Submission: 30.10.2023, IJST)

Table S 3. Model 2: Matrix of Correlations (SPSS Version 27)

|                                                                           |                     | Korrelationen                                           |                                                               |                                                                           |                         |                                               |                                  |                     |                                   |                                                                     |                                            |                                         |                                                           |                                                     |                                                                          |                                                                        |                      |                                |                                 |                                                                        |                                                  |                                  |                                                |
|---------------------------------------------------------------------------|---------------------|---------------------------------------------------------|---------------------------------------------------------------|---------------------------------------------------------------------------|-------------------------|-----------------------------------------------|----------------------------------|---------------------|-----------------------------------|---------------------------------------------------------------------|--------------------------------------------|-----------------------------------------|-----------------------------------------------------------|-----------------------------------------------------|--------------------------------------------------------------------------|------------------------------------------------------------------------|----------------------|--------------------------------|---------------------------------|------------------------------------------------------------------------|--------------------------------------------------|----------------------------------|------------------------------------------------|
|                                                                           |                     | Children in Household (Reference Category: No Children) | Number of Cars in Household (Total Private and Business Cars) | Number of Bicycles in Household (Total Conventional Bicycles and E-Bikes) | Employment in Education | Employment: Employed Persons Aged 35 and More | Employment: Non-Employed Persons | Employment: Retired | Gender (Reference Category: Male) | High-School Graduation (Reference Category: No High School Diploma) | Area Type: (Detached) Single-Family Houses | Area Type: Detached Apartment Buildings | Area Type: Rowed Apartment Buildings in Residential Areas | Area Type: Rowed Apartment Buildings in Mixed Areas | Accessibility of 5 out of 5 Facilities of Daily Needs in a 5-Minute Walk | Accessibility of at Least One Public Transport Mode in a 5-Minute Walk | The Walk is Not Long | It Goes the Fastest by Walking | Sidewalks Are Sufficiently Wide | Along the Walkway There Are Attractive Green Areas (e.g. parks, trees) | Along the Walkway There Are Attractive Buildings | Along the Walkway Traffic is Low | Along the Walkway It is Secure (Crime-Related) |
| Children in Household (Reference Category: No Children)                   | Pearson-Korrelation | 1                                                       |                                                               |                                                                           |                         |                                               |                                  |                     |                                   |                                                                     |                                            |                                         |                                                           |                                                     |                                                                          |                                                                        |                      |                                |                                 |                                                                        |                                                  |                                  |                                                |
|                                                                           | N                   | 4352                                                    |                                                               |                                                                           |                         |                                               |                                  |                     |                                   |                                                                     |                                            |                                         |                                                           |                                                     |                                                                          |                                                                        |                      |                                |                                 |                                                                        |                                                  |                                  |                                                |
| Number of Cars in Household (Total Private and Business Cars)             | Pearson-Korrelation |                                                         | 1                                                             |                                                                           |                         |                                               |                                  |                     |                                   |                                                                     |                                            |                                         |                                                           |                                                     |                                                                          |                                                                        |                      |                                |                                 |                                                                        |                                                  |                                  |                                                |
|                                                                           | N                   | 4342                                                    | 4342                                                          |                                                                           |                         |                                               |                                  |                     |                                   |                                                                     |                                            |                                         |                                                           |                                                     |                                                                          |                                                                        |                      |                                |                                 |                                                                        |                                                  |                                  |                                                |
| Number of Bicycles in Household (Total Conventional Bicycles and E-Bikes) | Pearson-Korrelation |                                                         |                                                               | 1                                                                         |                         |                                               |                                  |                     |                                   |                                                                     |                                            |                                         |                                                           |                                                     |                                                                          |                                                                        |                      |                                |                                 |                                                                        |                                                  |                                  |                                                |
|                                                                           | N                   | 4342                                                    | 4342                                                          | 4342                                                                      |                         |                                               |                                  |                     |                                   |                                                                     |                                            |                                         |                                                           |                                                     |                                                                          |                                                                        |                      |                                |                                 |                                                                        |                                                  |                                  |                                                |
| Employment in Education                                                   | Pearson-Korrelation |                                                         |                                                               |                                                                           | 1                       |                                               |                                  |                     |                                   |                                                                     |                                            |                                         |                                                           |                                                     |                                                                          |                                                                        |                      |                                |                                 |                                                                        |                                                  |                                  |                                                |
|                                                                           | N                   | 4185                                                    | 4179                                                          | 4179                                                                      | 4185                    |                                               |                                  |                     |                                   |                                                                     |                                            |                                         |                                                           |                                                     |                                                                          |                                                                        |                      |                                |                                 |                                                                        |                                                  |                                  |                                                |
| Employment: Employed Persons Aged 35 and More                             | Pearson-Korrelation |                                                         |                                                               |                                                                           |                         | 1                                             |                                  |                     |                                   |                                                                     |                                            |                                         |                                                           |                                                     |                                                                          |                                                                        |                      |                                |                                 |                                                                        |                                                  |                                  |                                                |
|                                                                           | N                   | 4185                                                    | 4179                                                          | 4179                                                                      | 4185                    | 4185                                          |                                  |                     |                                   |                                                                     |                                            |                                         |                                                           |                                                     |                                                                          |                                                                        |                      |                                |                                 |                                                                        |                                                  |                                  |                                                |
| Employment: Non-Employed Persons                                          | Pearson-Korrelation |                                                         |                                                               |                                                                           |                         |                                               | 1                                |                     |                                   |                                                                     |                                            |                                         |                                                           |                                                     |                                                                          |                                                                        |                      |                                |                                 |                                                                        |                                                  |                                  |                                                |
|                                                                           | N                   | 4185                                                    | 4179                                                          | 4179                                                                      | 4185                    | 4185                                          | 4185                             |                     |                                   |                                                                     |                                            |                                         |                                                           |                                                     |                                                                          |                                                                        |                      |                                |                                 |                                                                        |                                                  |                                  |                                                |
| Employment: Retired                                                       | Pearson-Korrelation |                                                         |                                                               |                                                                           |                         |                                               |                                  | 1                   |                                   |                                                                     |                                            |                                         |                                                           |                                                     |                                                                          |                                                                        |                      |                                |                                 |                                                                        |                                                  |                                  |                                                |
|                                                                           | N                   | 4185                                                    | 4179                                                          | 4179                                                                      | 4185                    | 4185                                          | 4185                             | 4185                |                                   |                                                                     |                                            |                                         |                                                           |                                                     |                                                                          |                                                                        |                      |                                |                                 |                                                                        |                                                  |                                  |                                                |
| Gender (Reference Category: Male)                                         | Pearson-Korrelation |                                                         |                                                               |                                                                           |                         |                                               |                                  |                     | 1                                 |                                                                     |                                            |                                         |                                                           |                                                     |                                                                          |                                                                        |                      |                                |                                 |                                                                        |                                                  |                                  |                                                |
|                                                                           | N                   | 4295                                                    | 4289                                                          | 4289                                                                      | 4148                    | 4148                                          | 4148                             | 4148                | 4148                              |                                                                     |                                            |                                         |                                                           |                                                     |                                                                          |                                                                        |                      |                                |                                 |                                                                        |                                                  |                                  |                                                |
| High-School Graduation (Reference Category: No High School Diploma)       | Pearson-Korrelation |                                                         |                                                               |                                                                           |                         |                                               |                                  |                     |                                   | 1                                                                   |                                            |                                         |                                                           |                                                     |                                                                          |                                                                        |                      |                                |                                 |                                                                        |                                                  |                                  |                                                |
|                                                                           | N                   | 4236                                                    | 4233                                                          | 4233                                                                      | 4233                    | 4233                                          | 4233                             | 4233                | 4233                              | 4236                                                                |                                            |                                         |                                                           |                                                     |                                                                          |                                                                        |                      |                                |                                 |                                                                        |                                                  |                                  |                                                |
| Area Type: (Detached) Single-Family Houses                                | Pearson-Korrelation |                                                         |                                                               |                                                                           |                         |                                               |                                  |                     |                                   |                                                                     | 1                                          |                                         |                                                           |                                                     |                                                                          |                                                                        |                      |                                |                                 |                                                                        |                                                  |                                  |                                                |
|                                                                           | N                   | 4154                                                    | 4144                                                          | 4144                                                                      | 3998                    | 3998                                          | 3998                             | 3998                | 4099                              | 4054                                                                | 4423                                       |                                         |                                                           |                                                     |                                                                          |                                                                        |                      |                                |                                 |                                                                        |                                                  |                                  |                                                |
| Area Type: Detached Apartment Buildings                                   | Pearson-Korrelation |                                                         |                                                               |                                                                           |                         |                                               |                                  |                     |                                   |                                                                     |                                            | 1                                       |                                                           |                                                     |                                                                          |                                                                        |                      |                                |                                 |                                                                        |                                                  |                                  |                                                |
|                                                                           | N                   | 4154                                                    | 4144                                                          | 4144                                                                      | 3998                    | 3998                                          | 3998                             | 3998                | 4099                              | 4054                                                                | 4423                                       | 4423                                    |                                                           |                                                     |                                                                          |                                                                        |                      |                                |                                 |                                                                        |                                                  |                                  |                                                |
| Area Type: Rowed Apartment Buildings in Residential Areas                 | Pearson-Korrelation |                                                         |                                                               |                                                                           |                         |                                               |                                  |                     |                                   |                                                                     |                                            |                                         | 1                                                         |                                                     |                                                                          |                                                                        |                      |                                |                                 |                                                                        |                                                  |                                  |                                                |
|                                                                           | N                   | 4154                                                    | 4144                                                          | 4144                                                                      | 3998                    | 3998                                          | 3998                             | 3998                | 4099                              | 4054                                                                | 4423                                       | 4423                                    | 4423                                                      |                                                     |                                                                          |                                                                        |                      |                                |                                 |                                                                        |                                                  |                                  |                                                |
| Area Type: Rowed Apartment Buildings in Mixed Areas                       | Pearson-Korrelation |                                                         |                                                               |                                                                           |                         |                                               |                                  |                     |                                   |                                                                     |                                            |                                         |                                                           | 1                                                   |                                                                          |                                                                        |                      |                                |                                 |                                                                        |                                                  |                                  |                                                |
|                                                                           | N                   | 4154                                                    | 4144                                                          | 4144                                                                      | 3998                    | 3998                                          | 3998                             | 3998                | 4099                              | 4054                                                                | 4423                                       | 4423                                    | 4423                                                      | 4423                                                |                                                                          |                                                                        |                      |                                |                                 |                                                                        |                                                  |                                  |                                                |
| Accessibility of 5 out of 5 Facilities of Daily Needs in a 5-Minute Walk  | Pearson-Korrelation |                                                         |                                                               |                                                                           |                         |                                               |                                  |                     |                                   |                                                                     |                                            |                                         |                                                           |                                                     | 1                                                                        |                                                                        |                      |                                |                                 |                                                                        |                                                  |                                  |                                                |
|                                                                           | N                   | 4352                                                    | 4342                                                          | 4342                                                                      | 4185                    | 4185                                          | 4185                             | 4185                | 4295                              | 4236                                                                | 4423                                       | 4423                                    | 4423                                                      | 4423                                                | 4637                                                                     |                                                                        |                      |                                |                                 |                                                                        |                                                  |                                  |                                                |
| Accessibility of at Least One Public Transport Mode in a 5-Minute Walk    | Pearson-Korrelation |                                                         |                                                               |                                                                           |                         |                                               |                                  |                     |                                   |                                                                     |                                            |                                         |                                                           |                                                     |                                                                          | 1                                                                      |                      |                                |                                 |                                                                        |                                                  |                                  |                                                |
|                                                                           | N                   | 4352                                                    | 4342                                                          | 4342                                                                      | 4185                    | 4185                                          | 4185                             | 4185                | 4295                              | 4236                                                                | 4423                                       | 4423                                    | 4423                                                      | 4423                                                | 4637                                                                     | 4637                                                                   |                      |                                |                                 |                                                                        |                                                  |                                  |                                                |
| The Walk is Not Long                                                      | Pearson-Korrelation |                                                         |                                                               |                                                                           |                         |                                               |                                  |                     |                                   |                                                                     |                                            |                                         |                                                           |                                                     |                                                                          |                                                                        | 1                    |                                |                                 |                                                                        |                                                  |                                  |                                                |
|                                                                           | N                   | 378                                                     | 378                                                           | 378                                                                       | 378                     | 378                                           | 378                              | 378                 | 378                               | 378                                                                 | 378                                        | 378                                     | 378                                                       | 378                                                 | 378                                                                      | 378                                                                    | 378                  |                                |                                 |                                                                        |                                                  |                                  |                                                |
| It Goes the Fastest by Walking                                            | Pearson-Korrelation |                                                         |                                                               |                                                                           |                         |                                               |                                  |                     |                                   |                                                                     |                                            |                                         |                                                           |                                                     |                                                                          |                                                                        |                      | 1                              |                                 |                                                                        |                                                  |                                  |                                                |
|                                                                           | N                   | 1942                                                    | 1934                                                          | 1934                                                                      | 1934                    | 1934                                          | 1934                             | 1934                | 1934                              | 1934                                                                | 1934                                       | 1934                                    | 1934                                                      | 1934                                                | 1934                                                                     | 1934                                                                   | 1934                 | 1942                           |                                 |                                                                        |                                                  |                                  |                                                |
| Sidewalks Are Sufficiently Wide                                           | Pearson-Korrelation |                                                         |                                                               |                                                                           |                         |                                               |                                  |                     |                                   |                                                                     |                                            |                                         |                                                           |                                                     |                                                                          |                                                                        |                      |                                | 1                               |                                                                        |                                                  |                                  |                                                |
|                                                                           | N                   | 1942                                                    | 1934                                                          | 1934                                                                      | 1934                    | 1934                                          | 1934                             | 1934                | 1934                              | 1934                                                                | 1934                                       | 1934                                    | 1934                                                      | 1934                                                | 1934                                                                     | 1934                                                                   | 1934                 | 1934                           | 1942                            |                                                                        |                                                  |                                  |                                                |
| Along the Walkway There Are Attractive Green Areas (e.g. parks, trees)    | Pearson-Korrelation |                                                         |                                                               |                                                                           |                         |                                               |                                  |                     |                                   |                                                                     |                                            |                                         |                                                           |                                                     |                                                                          |                                                                        |                      |                                |                                 | 1                                                                      |                                                  |                                  |                                                |
|                                                                           | N                   | 1917                                                    | 1909                                                          | 1909                                                                      | 1852                    | 1852                                          | 1852                             | 1852                | 1852                              | 1852                                                                | 1852                                       | 1852                                    | 1852                                                      | 1852                                                | 1852                                                                     | 1852                                                                   | 1852                 | 1852                           | 1852                            | 1917                                                                   |                                                  |                                  |                                                |
| Along the Walkway There Are Attractive Buildings                          | Pearson-Korrelation |                                                         |                                                               |                                                                           |                         |                                               |                                  |                     |                                   |                                                                     |                                            |                                         |                                                           |                                                     |                                                                          |                                                                        |                      |                                |                                 |                                                                        | 1                                                |                                  |                                                |
|                                                                           | N                   | 1873                                                    | 1866                                                          | 1866                                                                      | 1815                    | 1815                                          | 1815                             | 1815                | 1815                              | 1815                                                                | 1815                                       | 1815                                    | 1815                                                      | 1815                                                | 1815                                                                     | 1815                                                                   | 1815                 | 1815                           | 1815                            | 1873                                                                   |                                                  |                                  |                                                |
| Along the Walkway Traffic is Low                                          | Pearson-Korrelation |                                                         |                                                               |                                                                           |                         |                                               |                                  |                     |                                   |                                                                     |                                            |                                         |                                                           |                                                     |                                                                          |                                                                        |                      |                                |                                 |                                                                        |                                                  | 1                                |                                                |
|                                                                           | N                   | 1917                                                    | 1909                                                          | 1909                                                                      | 1852                    | 1852                                          | 1852                             | 1852                | 1852                              | 1852                                                                | 1852                                       | 1852                                    | 1852                                                      | 1852                                                | 1852                                                                     | 1852                                                                   | 1852                 | 1852                           | 1852                            | 1917                                                                   |                                                  |                                  |                                                |
| Along the Walkway It is Secure (Crime-Related)                            | Pearson-Korrelation |                                                         |                                                               |                                                                           |                         |                                               |                                  |                     |                                   |                                                                     |                                            |                                         |                                                           |                                                     |                                                                          |                                                                        |                      |                                |                                 |                                                                        |                                                  |                                  | 1                                              |
|                                                                           | N                   | 1802                                                    | 1794                                                          | 1794                                                                      | 1742                    | 1742                                          | 1742                             | 1742                | 1742                              | 1742                                                                | 1742                                       | 1742                                    | 1742                                                      | 1742                                                | 1742                                                                     | 1742                                                                   | 1742                 | 1742                           | 1742                            | 1802                                                                   |                                                  |                                  |                                                |

\*\*\* Die Korrelation ist auf dem Niveau von 0.01 (2-seitig) signifikant.  
 \*\* Die Korrelation ist auf dem Niveau von 0.05 (2-seitig) signifikant.

## Model 1: Leisure Walking

Table S 4. Model 1: Socio-Demographic and Socio-Economic Factors

|                                                                                          | Persons walking less than three to four days a week | Persons walking daily or almost daily | All Persons |
|------------------------------------------------------------------------------------------|-----------------------------------------------------|---------------------------------------|-------------|
| <b>Children in Household [%]</b>                                                         |                                                     |                                       |             |
| No Child(ren) [%]                                                                        | 81.5                                                | 82.6                                  | 82.1        |
| Child(ren) in Household [%]                                                              | 18.5                                                | 17.4                                  | 17.9        |
|                                                                                          | 100                                                 | 100                                   | 100         |
| n                                                                                        | 1,900                                               | 2,451                                 | 4,352       |
| <b>Average Number of Cars in Household (Total Private and Business Cars)</b>             |                                                     |                                       |             |
| Average Number of Cars in Household (Total Private and Business Cars)                    | 1.28                                                | 1.0                                   | 1.12        |
| n                                                                                        | 1,899                                               | 2,443                                 | 4,342       |
| <b>Average Number of Bicycles in Household (Total Conventional Bicycles and E-Bikes)</b> |                                                     |                                       |             |
| Average Number of Bicycles in Household (Total Conventional Bicycles and E-Bikes)        | 2.30                                                | 2.1                                   | 2.19        |
| n                                                                                        | 1,899                                               | 2,443                                 | 4,342       |
| <b>Employment [%]</b>                                                                    |                                                     |                                       |             |
| In Education [%]                                                                         | 13.3                                                | 18.3                                  | 16.1        |
| Employed Persons Aged Under 35 Years [%]                                                 | 17.7                                                | 14.0                                  | 15.7        |
| Employed Persons Aged 35 and More [%]                                                    | 47.1                                                | 36.5                                  | 41.1        |
| Non-Employed Persons [%]                                                                 | 3.3                                                 | 6.2                                   | 4.9         |
| Retired [%]                                                                              | 18.6                                                | 24.9                                  | 22.2        |
|                                                                                          | 100                                                 | 100                                   | 100         |
| n                                                                                        | 1,823                                               | 2,362                                 | 4,185       |
| <b>Gender [%]</b>                                                                        |                                                     |                                       |             |
| Male [%]                                                                                 | 51.8                                                | 48.0                                  | 49.6        |
| Female [%]                                                                               | 48.2                                                | 52.0                                  | 50.4        |
|                                                                                          | 100                                                 | 100                                   | 100         |
| n                                                                                        | 1,868                                               | 2,427                                 | 4,295       |
| <b>High-School Graduation</b>                                                            |                                                     |                                       |             |
| No High School Diploma [%]                                                               | 26.7                                                | 25.6                                  | 26.1        |
| High-School Graduation [%]                                                               | 73.3                                                | 74.4                                  | 73.9        |
|                                                                                          | 100                                                 | 100                                   | 100         |
| n                                                                                        | 1,865                                               | 2,372                                 | 4,236       |

Table S 5. Model 1: Meso-Scale Factors (Neighborhood)

|                                                                              | Persons walking less than three to four days a week | Persons walking daily or almost daily | All Persons |
|------------------------------------------------------------------------------|-----------------------------------------------------|---------------------------------------|-------------|
| <b>Area Type by Predominant Building Type [%]</b>                            |                                                     |                                       |             |
| (Detached) Single-Family Houses [%]                                          | 30.5                                                | 18.1                                  | 23.5        |
| Detached Apartment Buildings [%]                                             | 13.5                                                | 13.6                                  | 13.6        |
| Rowed Apartment Buildings in Residential Areas [%]                           | 35.1                                                | 33.5                                  | 34.2        |
| Rowed Apartment Buildings in Mixed Areas [%]                                 | 20.9                                                | 34.8                                  | 28.7        |
|                                                                              | 100                                                 | 100                                   | 100         |
| n                                                                            | 1,947                                               | 2,476                                 | 4,423       |
| <b>Accessibility of Facilities of Daily Needs [%]</b>                        |                                                     |                                       |             |
| Less Than 5 Facilities of Daily Needs Accessible in a 5-Minute Walk [%]      | 91.6                                                | 85.1                                  | 87.9        |
| Accessibility of 5 out of 5 Facilities of Daily Needs in a 5-Minute Walk [%] | 8.4                                                 | 14.9                                  | 12.1        |
|                                                                              | 100                                                 | 100                                   | 100         |
| n                                                                            | 2,007                                               | 2,630                                 | 4,637       |
| <b>Accessibility of Public Transport [%]</b>                                 |                                                     |                                       |             |
| No Public Transport Mode Accessible in a 5-Minute Walk [%]                   | 22.8                                                | 16.3                                  | 19.1        |
| Accessibility of at Least One Public Transport Mode in a 5-Minute Walk [%]   | 77.2                                                | 83.7                                  | 80.9        |
|                                                                              | 100                                                 | 100                                   | 100         |
| n                                                                            | 2,007                                               | 2,630                                 | 4,637       |



**Perceived Importance of Context-Specific Built-Environment Factors of Walking: A New Perspective for Prioritizing Policy Measures for Promoting Walking | [Supplementary Material](#)**

Caroline Koszowski, Rico Wittwer, Stefan Hubrich, Regine Gerike (Date of Submission: 30.10.2023, IJST)

**Table S 6. Model 1: Micro-Scale Factors (Streetscape)**

|                                                                                           | Persons walking less than three to four days a week |                           |           | Persons walking daily or almost daily |                           |           | All Persons                 |                           |           |
|-------------------------------------------------------------------------------------------|-----------------------------------------------------|---------------------------|-----------|---------------------------------------|---------------------------|-----------|-----------------------------|---------------------------|-----------|
|                                                                                           | (Some-what) Unimportant [%]                         | (Some-what) Important [%] | n         | (Some-what) Unimportant [%]           | (Some-what) Important [%] | n         | (Some-what) Unimportant [%] | (Some-what) Important [%] | n         |
| High Surface Quality (Flat, Non-Slip, Without Damage)                                     | 10.2                                                | 89.8                      | 100 2,005 | 9.4                                   | 90.6                      | 100 2,626 | 9.7                         | 90.3                      | 100 4,631 |
| Lot of Space to Walk                                                                      | 10.1                                                | 89.9                      | 100 1,998 | 6.4                                   | 93.6                      | 100 2,615 | 8.0                         | 92.0                      | 100 4,613 |
| Street Furniture                                                                          | 19.7                                                | 80.3                      | 100 2,003 | 15.3                                  | 84.7                      | 100 2,614 | 17.2                        | 82.8                      | 100 4,617 |
| Public Toilets                                                                            | 49.6                                                | 50.4                      | 100 2,000 | 48.9                                  | 51.1                      | 100 2,609 | 49.2                        | 50.8                      | 100 4,610 |
| Good Lighting                                                                             | 5.5                                                 | 94.5                      | 100 2,005 | 4.9                                   | 95.1                      | 100 2,618 | 5.1                         | 94.9                      | 100 4,623 |
| Trees and Planting Along Sidewalks                                                        | 7.1                                                 | 92.9                      | 100 2,004 | 6.4                                   | 93.6                      | 100 2,620 | 6.7                         | 93.3                      | 100 4,624 |
| First Floor Area With Shop Windows and/or Gastronomy Along the Sidewalks                  | 36.2                                                | 63.8                      | 100 1,998 | 36.0                                  | 64.0                      | 100 2,613 | 36.1                        | 63.9                      | 100 4,611 |
| Attractive Buildings (e.g. Façade)                                                        | 21.7                                                | 78.3                      | 100 1,998 | 20.2                                  | 79.8                      | 100 2,620 | 20.9                        | 79.1                      | 100 4,618 |
| Appropriate Height of Buildings in Relation to the Street Space (Streetscape Proportions) | 38.6                                                | 61.4                      | 100 2,001 | 38.5                                  | 61.5                      | 100 2,620 | 38.6                        | 61.4                      | 100 4,621 |
| Low Vehicle Traffic                                                                       | 20.7                                                | 79.3                      | 100 1,997 | 20.1                                  | 79.9                      | 100 2,621 | 20.4                        | 79.6                      | 100 4,619 |
| Low Speed of Vehicle Traffic                                                              | 18.8                                                | 81.2                      | 100 2,002 | 17.8                                  | 82.2                      | 100 2,612 | 18.2                        | 81.8                      | 100 4,614 |
| Crime-Related Security                                                                    | 4.0                                                 | 96.0                      | 100 2,004 | 2.7                                   | 97.3                      | 100 2,617 | 3.3                         | 96.7                      | 100 4,621 |
| Traffic Accident Safety                                                                   | 3.4                                                 | 96.6                      | 100 2,002 | 2.1                                   | 97.9                      | 100 2,622 | 2.7                         | 97.3                      | 100 4,624 |
| Safe Crossings                                                                            | 5.6                                                 | 94.4                      | 100 1,998 | 4.6                                   | 95.4                      | 100 2,619 | 5.1                         | 94.9                      | 100 4,617 |

Table S 7. Model 1: Further Descriptives: Perception of Walking Characteristics

|                                                                      | Persons walking less than three to four days a week |       | Persons walking daily or almost daily |       | All Persons  |       |
|----------------------------------------------------------------------|-----------------------------------------------------|-------|---------------------------------------|-------|--------------|-------|
|                                                                      | Average (SD)                                        | n     | Average (SD)                          | n     | Average (SD) | n     |
| <i>I consider walking to be...(Scale: -10 ... +10)</i>               |                                                     |       |                                       |       |              |       |
| Monotonous vs. varying                                               | 1.6 (5.0)                                           | 1,937 | 3.7 (4.6)                             | 2,508 | 2.8 (4.9)    | 4,446 |
| Boring vs. interesting                                               | 1.5 (4.8)                                           | 1,936 | 3.5 (4.4)                             | 2,508 | 2.6 (4.7)    | 4,444 |
| Time-consuming vs. time saving                                       | -2.6 (4.4)                                          | 1,936 | -0.6 (4.6)                            | 2,506 | -1.4 (4.6)   | 4,442 |
| Unflexible vs. flexible                                              | 2.5 (4.7)                                           | 1,937 | 4.6 (4.1)                             | 2,507 | 3.7 (4.5)    | 4,443 |
| Exhausting vs. easy                                                  | 3.3 (5.2)                                           | 1,936 | 4.9 (4.6)                             | 2,507 | 4.2 (4.9)    | 4,444 |
| Uncomfortable vs. comfortable                                        | 3.1 (4.7)                                           | 1,936 | 4.8 (4.2)                             | 2,507 | 4.1 (4.5)    | 4,443 |
| Not socially accepted vs. socially accepted                          | 3.2 (4.5)                                           | 1,936 | 4.0 (4.4)                             | 2,506 | 3.7 (4.5)    | 4,442 |
| Unsecure crime-related vs. secure crime-related                      | 1.0 (5.2)                                           | 1,936 | 1.5 (5.0)                             | 2,506 | 1.3 (5.1)    | 4,443 |
| Unsafe traffic-related vs. safe traffic-related                      | 2.6 (4.7)                                           | 1,936 | 2.8 (4.7)                             | 2,506 | 2.7 (4.7)    | 4,442 |
| Badly plannable in terms of time vs. well plannable in terms of time | 2.6 (5.3)                                           | 1,936 | 4.7 (4.6)                             | 2,506 | 3.8 (5.0)    | 4,442 |

Table S 8. Model 1: Further Descriptives: Mode Choice Criteria

|                                               | Persons walking less than three to four days a week |                           |           | Persons walking daily or almost daily |                           |           | All Persons                 |                           |           |
|-----------------------------------------------|-----------------------------------------------------|---------------------------|-----------|---------------------------------------|---------------------------|-----------|-----------------------------|---------------------------|-----------|
|                                               | (Some-what) Unimportant [%]                         | (Some-what) Important [%] | n         | (Some-what) Unimportant [%]           | (Some-what) Important [%] | n         | (Some-what) Unimportant [%] | (Some-what) Important [%] | n         |
| Foreseeable travel time                       | 5.1                                                 | 94.9                      | 100 1,994 | 5.5                                   | 94.5                      | 100 2,619 | 5.3                         | 94.7                      | 100 4,614 |
| Short travel or walking time                  | 6.1                                                 | 93.9                      | 100 1,990 | 7.2                                   | 92.8                      | 100 2,607 | 6.7                         | 93.3                      | 100 4,596 |
| Low costs                                     | 15.5                                                | 84.5                      | 100 1,988 | 12.1                                  | 87.9                      | 100 2,627 | 13.5                        | 86.5                      | 100 4,616 |
| High Comfort                                  | 36.5                                                | 63.5                      | 100 1,990 | 39.9                                  | 60.1                      | 100 2,625 | 38.4                        | 61.6                      | 100 4,614 |
| Internet access available                     | 74.3                                                | 25.7                      | 100 1,994 | 69.1                                  | 30.9                      | 100 2,625 | 71.4                        | 28.6                      | 100 4,619 |
| Available mobile network                      | 40.9                                                | 59.1                      | 100 1,993 | 39.0                                  | 61.0                      | 100 2,622 | 39.8                        | 60.2                      | 100 4,615 |
| Crime-Related Security                        | 7.2                                                 | 92.8                      | 100 1,993 | 5.0                                   | 95.0                      | 100 2,622 | 5.9                         | 94.1                      | 100 4,615 |
| Traffic Safety                                | 7.9                                                 | 92.1                      | 100 1,997 | 3.6                                   | 96.4                      | 100 2,624 | 5.5                         | 94.5                      | 100 4,621 |
| Low exposure to air pollution                 | 19.9                                                | 80.1                      | 100 1,991 | 15.8                                  | 84.2                      | 100 2,624 | 17.5                        | 82.5                      | 100 4,616 |
| Privacy (I do not travel with unknown people) | 65.1                                                | 34.9                      | 100 1,986 | 65.7                                  | 34.3                      | 100 2,616 | 65.5                        | 34.5                      | 100 4,602 |
| Benefits for my health                        | 27.3                                                | 72.7                      | 100 1,989 | 21.5                                  | 78.5                      | 100 2,617 | 24.0                        | 76.0                      | 100 4,606 |
| High environmental friendliness               | 22.6                                                | 77.4                      | 100 1,996 | 15.4                                  | 84.6                      | 100 2,620 | 18.5                        | 81.5                      | 100 4,615 |
| Flexible departure times                      | 10.2                                                | 89.8                      | 100 1,994 | 11.8                                  | 88.2                      | 100 2,623 | 11.1                        | 88.9                      | 100 4,617 |

## Model 2: Utilitarian Walking

Table S 9. Model 2: Socio-Demographic and Socio-Economic Factors

|                                                                                          | Persons walking less than three to four days a week | Persons walking daily or almost daily | All Persons |
|------------------------------------------------------------------------------------------|-----------------------------------------------------|---------------------------------------|-------------|
| <b>Children in Household [%]</b>                                                         |                                                     |                                       |             |
| No Child(ren) [%]                                                                        | 83.9                                                | 85.4                                  | 85.0        |
| Child(ren) in Household [%]                                                              | 16.1                                                | 14.6                                  | 15.0        |
|                                                                                          | 100                                                 | 100                                   | 100         |
| n                                                                                        | 572                                                 | 1,427                                 | 1,999       |
| <b>Average Number of Cars in Household (Total Private and Business Cars)</b>             |                                                     |                                       |             |
| Average Number of Cars in Household (Total Private and Business Cars)                    | 0.92                                                | 0.8                                   | 0.83        |
| n                                                                                        | 571                                                 | 1,420                                 | 1,991       |
| <b>Average Number of Bicycles in Household (Total Conventional Bicycles and E-Bikes)</b> |                                                     |                                       |             |
| Average Number of Bicycles in Household (Total Conventional Bicycles and E-Bikes)        | 2.05                                                | 2.0                                   | 1.99        |
| n                                                                                        | 571                                                 | 1,420                                 | 1,991       |
| <b>Employment [%]</b>                                                                    |                                                     |                                       |             |
| In Education [%]                                                                         | 20.6                                                | 23.3                                  | 22.5        |
| Employed Persons Aged Under 35 Years [%]                                                 | 24.9                                                | 15.3                                  | 18.1        |
| Employed Persons Aged 35 and More [%]                                                    | 37.1                                                | 32.6                                  | 33.9        |
| Non-Employed Persons [%]                                                                 | 3.4                                                 | 5.6                                   | 5.0         |
| Retired [%]                                                                              | 14.0                                                | 23.1                                  | 20.5        |
|                                                                                          | 100                                                 | 100                                   | 100         |
| n                                                                                        | 555                                                 | 1,378                                 | 1,934       |
| <b>Gender [%]</b>                                                                        |                                                     |                                       |             |
| Male [%]                                                                                 | 52.9                                                | 47.7                                  | 49.2        |
| Female [%]                                                                               | 47.1                                                | 52.3                                  | 50.8        |
|                                                                                          | 100                                                 | 100                                   | 100         |
| n                                                                                        | 566                                                 | 1,411                                 | 1,976       |
| <b>High-School Graduation [%]</b>                                                        |                                                     |                                       |             |
| No High School Diploma [%]                                                               | 21.9                                                | 25.2                                  | 24.2        |
| High-School Graduation [%]                                                               | 78.1                                                | 74.8                                  | 75.8        |
|                                                                                          | 100                                                 | 100                                   | 100         |
| n                                                                                        | 1,865                                               | 2,372                                 | 4,236       |

Table S 10. Model 2: Meso-Scale Factors (Neighborhood)

|                                                                              | Persons walking less than three to four days a week | Persons walking daily or almost daily | All Persons |
|------------------------------------------------------------------------------|-----------------------------------------------------|---------------------------------------|-------------|
| <b>Area Type by Predominant Building Type [%]</b>                            |                                                     |                                       |             |
| (Detached) Single-Family Houses [%]                                          | 16.8                                                | 11.6                                  | 13.1        |
| Detached Apartment Buildings [%]                                             | 8.2                                                 | 10.9                                  | 10.1        |
| Rowed Apartment Buildings in Residential Areas [%]                           | 38.5                                                | 33.5                                  | 35.0        |
| Rowed Apartment Buildings in Mixed Areas [%]                                 | 36.4                                                | 43.9                                  | 41.8        |
|                                                                              | 100                                                 | 100                                   | 100         |
| n                                                                            | 568                                                 | 1,390                                 | 1,958       |
| <b>Accessibility of Facilities of Daily Needs [%]</b>                        |                                                     |                                       |             |
| Less Than 5 Facilities of Daily Needs Accessible in a 5-Minute Walk [%]      | 84.3                                                | 80.7                                  | 81.7        |
| Accessibility of 5 out of 5 Facilities of Daily Needs in a 5-Minute Walk [%] | 15.7                                                | 19.3                                  | 18.3        |
|                                                                              | 100                                                 | 100                                   | 100         |
| n                                                                            | 583                                                 | 1,453                                 | 2,036       |
| <b>Accessibility of Public Transport [%]</b>                                 |                                                     |                                       |             |
| No Public Transport Mode Accessible in a 5-Minute Walk [%]                   | 14.0                                                | 13.4                                  | 13.6        |
| Accessibility of at Least One Public Transport Mode in a 5-Minute Walk [%]   | 86.0                                                | 86.6                                  | 86.4        |
|                                                                              | 100                                                 | 100                                   | 100         |
| n                                                                            | 583                                                 | 1,453                                 | 2,036       |

Table S 11. Model 2: Micro-Scale Factors (Streetscape)

|                                                      | Persons walking less than three to four days a week |                     |     |     | Persons walking daily or almost daily |                     |     |       | All Persons                |                     |     |       |
|------------------------------------------------------|-----------------------------------------------------|---------------------|-----|-----|---------------------------------------|---------------------|-----|-------|----------------------------|---------------------|-----|-------|
|                                                      | I (fully) do not agree [%]                          | I (fully) agree [%] | 100 | n   | I (fully) do not agree [%]            | I (fully) agree [%] | 100 | n     | I (fully) do not agree [%] | I (fully) agree [%] | 100 | n     |
| "The Walk Is Not Long"                               | 6.0                                                 | 94.0                | 100 | 579 | 4.3                                   | 95.7                | 100 | 1,440 | 4.8                        | 95.2                | 100 | 2,018 |
| "It Goes the Fastest by Walking"                     | 22.8                                                | 77.2                | 100 | 570 | 20.0                                  | 80.0                | 100 | 1,433 | 20.8                       | 79.2                | 100 | 2,002 |
| "It Is Not Hilly"                                    | 36.0                                                | 64.0                | 100 | 538 | 28.8                                  | 71.2                | 100 | 1,392 | 30.8                       | 69.2                | 100 | 1,930 |
| "Sidewalks Are Sufficiently Wide"                    | 23.9                                                | 76.1                | 100 | 557 | 22.1                                  | 77.9                | 100 | 1,409 | 22.6                       | 77.4                | 100 | 1,966 |
| "Sidewalks Are Easy To Walk On"                      | 18.0                                                | 82.0                | 100 | 563 | 17.0                                  | 83.0                | 100 | 1,411 | 17.3                       | 82.7                | 100 | 1,974 |
| "Sidewalks Are Well Lit"                             | 25.3                                                | 74.7                | 100 | 544 | 24.2                                  | 75.8                | 100 | 1,399 | 24.5                       | 75.5                | 100 | 1,942 |
| "Along the Walkway There Are Attractive Green Areas" | 66.7                                                | 33.3                | 100 | 558 | 59.2                                  | 40.8                | 100 | 1,383 | 61.4                       | 38.6                | 100 | 1,941 |
| "Along the Walkway There Are Opportunities To Sit"   | 87.5                                                | 12.5                | 100 | 523 | 83.9                                  | 16.1                | 100 | 1,287 | 84.9                       | 15.1                | 100 | 1,810 |
| "Along the Walkway Are Attractive Buildings"         | 73.0                                                | 27.0                | 100 | 535 | 63.6                                  | 36.4                | 100 | 1,361 | 66.3                       | 33.7                | 100 | 1,896 |
| "Along The Walkway Traffic Is Low"                   | 60.9                                                | 39.1                | 100 | 559 | 62.6                                  | 37.4                | 100 | 1,371 | 62.1                       | 37.9                | 100 | 1,930 |
| "Along The Walkway It Is Safe" (Traffic-Related)     | 37.4                                                | 62.6                | 100 | 537 | 38.3                                  | 61.7                | 100 | 1,364 | 38.0                       | 62.0                | 100 | 1,902 |
| "Along The Walkway It Is Secure" (Crime-Related)     | 48.3                                                | 51.7                | 100 | 508 | 48.8                                  | 51.2                | 100 | 1,312 | 48.7                       | 51.3                | 100 | 1,820 |

Table S 12. Model 2: Further Descriptives: Perception of Walking Characteristics

| <i>I consider walking to be...</i> (Scale: -10 ... +10)              | Persons walking less than three to four days a week |     | Persons walking daily or almost daily |      | All Persons  |      |
|----------------------------------------------------------------------|-----------------------------------------------------|-----|---------------------------------------|------|--------------|------|
|                                                                      | Average (SD)                                        | n   | Average (SD)                          | n    | Average (SD) | n    |
| Monotonous vs. varying                                               | 2.4 (4.8)                                           | 583 | 3.8 (4.7)                             | 1453 | 3.4 (4.8)    | 2036 |
| Boring vs. interesting                                               | 2.3 (4.7)                                           | 583 | 3.8 (4.3)                             | 1453 | 3.3 (4.5)    | 2036 |
| Time-consuming vs. time saving                                       | -1.7 (4.1)                                          | 583 | -0.1 (4.6)                            | 1453 | -0.6 (4.5)   | 2036 |
| Unflexible vs. flexible                                              | 3.2 (4.3)                                           | 583 | 4.9 (4.1)                             | 1453 | 4.5 (4.2)    | 2036 |
| Exhausting vs. easy                                                  | 3.7 (5.0)                                           | 583 | 5.1 (4.5)                             | 1453 | 4.7 (4.7)    | 2036 |
| Uncomfortable vs. comfortable                                        | 3.8 (4.5)                                           | 583 | 5.1 (4.1)                             | 1453 | 4.7 (4.3)    | 2036 |
| Not socially accepted vs. socially accepted                          | 3.5 (4.6)                                           | 583 | 4.1 (4.6)                             | 1453 | 3.9 (4.6)    | 2036 |
| Unsecure crime-related vs. secure crime-related                      | 1.7 (4.9)                                           | 583 | 1.4 (5.1)                             | 1453 | 1.5 (5.0)    | 2036 |
| Unsafe traffic-related vs. safe traffic-related                      | 3.1 (4.6)                                           | 583 | 2.7 (4.8)                             | 1453 | 2.8 (4.7)    | 2036 |
| Badly plannable in terms of time vs. well plannable in terms of time | 3.5 (4.9)                                           | 583 | 4.8 (4.7)                             | 1453 | 4.4 (4.8)    | 2036 |

Table S 13. Model 2: Further Descriptives: Mode Choice Criteria

|                                               | Persons walking less than three to four days a week |                           |     | Persons walking daily or almost daily |                           |      | All Persons                 |                           |      |      |     |       |
|-----------------------------------------------|-----------------------------------------------------|---------------------------|-----|---------------------------------------|---------------------------|------|-----------------------------|---------------------------|------|------|-----|-------|
|                                               | (Some-what) Unimportant [%]                         | (Some-what) Important [%] | n   | (Some-what) Unimportant [%]           | (Some-what) Important [%] | n    | (Some-what) Unimportant [%] | (Some-what) Important [%] | n    |      |     |       |
| Foreseeable travel time                       | 5.5                                                 | 94.5                      | 100 | 579                                   | 5.2                       | 94.8 | 100                         | 1,447                     | 5.3  | 94.7 | 100 | 2,025 |
| Short travel or walking time                  | 7.5                                                 | 92.5                      | 100 | 581                                   | 7.4                       | 92.6 | 100                         | 1,445                     | 7.4  | 92.6 | 100 | 2,026 |
| Low costs                                     | 12.4                                                | 87.6                      | 100 | 574                                   | 8.6                       | 91.4 | 100                         | 1,452                     | 9.7  | 90.3 | 100 | 2,026 |
| High Comfort                                  | 44.8                                                | 55.2                      | 100 | 578                                   | 39.6                      | 60.4 | 100                         | 1,449                     | 41.1 | 58.9 | 100 | 2,027 |
| Internet access available                     | 71.5                                                | 28.5                      | 100 | 581                                   | 68.3                      | 31.7 | 100                         | 1,450                     | 69.2 | 30.8 | 100 | 2,031 |
| Available mobile network                      | 38.9                                                | 61.1                      | 100 | 577                                   | 38.7                      | 61.3 | 100                         | 1,446                     | 38.8 | 61.2 | 100 | 2,023 |
| Crime-Related Security                        | 8.9                                                 | 91.1                      | 100 | 580                                   | 4.6                       | 95.4 | 100                         | 1,450                     | 5.8  | 94.2 | 100 | 2,030 |
| Traffic Safety                                | 8.3                                                 | 91.7                      | 100 | 581                                   | 3.6                       | 96.4 | 100                         | 1,450                     | 5.0  | 95.0 | 100 | 2,031 |
| Low exposure to air pollution                 | 16.9                                                | 83.1                      | 100 | 577                                   | 15.0                      | 85.0 | 100                         | 1,449                     | 15.5 | 84.5 | 100 | 2,025 |
| Privacy (I do not travel with unknown people) | 67.7                                                | 32.3                      | 100 | 580                                   | 68.5                      | 31.5 | 100                         | 1,442                     | 68.3 | 31.7 | 100 | 2,022 |
| Benefits for my health                        | 24.3                                                | 75.7                      | 100 | 578                                   | 21.0                      | 79.0 | 100                         | 1,445                     | 21.9 | 78.1 | 100 | 2,023 |
| High environmental friendliness               | 18.2                                                | 81.8                      | 100 | 581                                   | 12.8                      | 87.2 | 100                         | 1,444                     | 14.3 | 85.7 | 100 | 2,026 |
| Flexible departure times                      | 12.2                                                | 87.8                      | 100 | 580                                   | 11.3                      | 88.7 | 100                         | 1,444                     | 11.6 | 88.4 | 100 | 2,030 |
